# Supplementary material
Source: PubMed Central journal article supplement (PMC6645494)
Supplement: ao7b01434_si_001.pdf [file ao7b01434_si_001.pdf]

# Investigation of Triphenylamine (TPA) based Metal Complexes and Their Application in Perovskite Solar Cells

*Wei Zhang,<sup>a</sup> Peng Liu,<sup>a</sup> Azar Sadollahkhani,<sup>a</sup> Yuanyuan Li,<sup>b</sup> Biaobiao Zhang,<sup>c</sup> Fuguo Zhang,<sup>c</sup>  
Majid Safdari,<sup>a</sup> Yan Hao,<sup>d, 1</sup> Yong Hua,<sup>a\*, 2</sup> Lars Kloo<sup>a\*</sup>*

a) Department of Chemistry, Applied Physical Chemistry, KTH Royal Institute of Technology,  
SE-10044 Stockholm, Sweden.

b) Wallenberg Wood Science Center, Department of Fiber and Polymer Technology, KTH Royal  
Institute of Technology, SE-10044 Stockholm, Sweden

c) Department of Chemistry, Organic Chemistry, KTH Royal Institute of Technology, SE-10044  
Stockholm, Sweden

d) Department of Chemistry – Ångström Laboratory, Physical Chemistry, Uppsala University,  
SE-75120 Uppsala, Swede

---

<sup>1</sup> Department of Chemistry, Applied Physical Chemistry, KTH Royal Institute of Technology, SE-10044 Stockholm, Sweden.

<sup>2</sup> School of Materials Science and Engineering, Yunnan University, Kunming 650000, P. R. China.

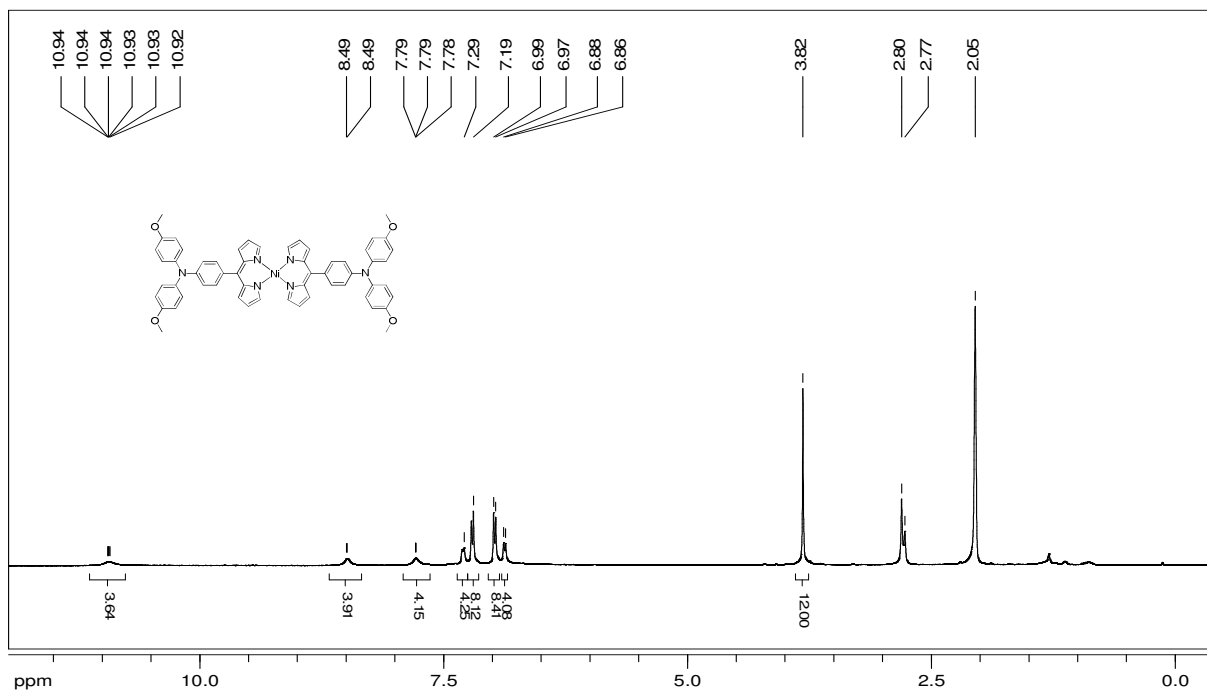

Figure S1.  $^1\text{H}$  NMR of Y1 in  $d_6$ -Acetone

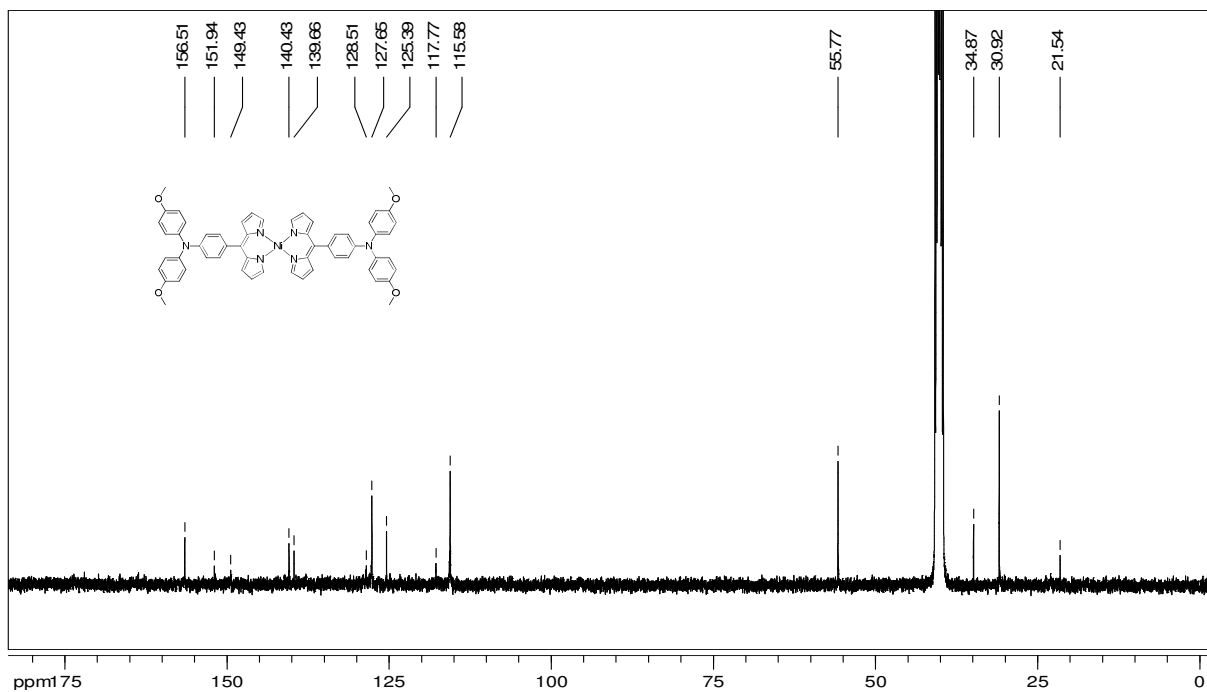

Figure S2.  $^{13}\text{C}$  NMR of Y1 in  $d_6$ -DMSO

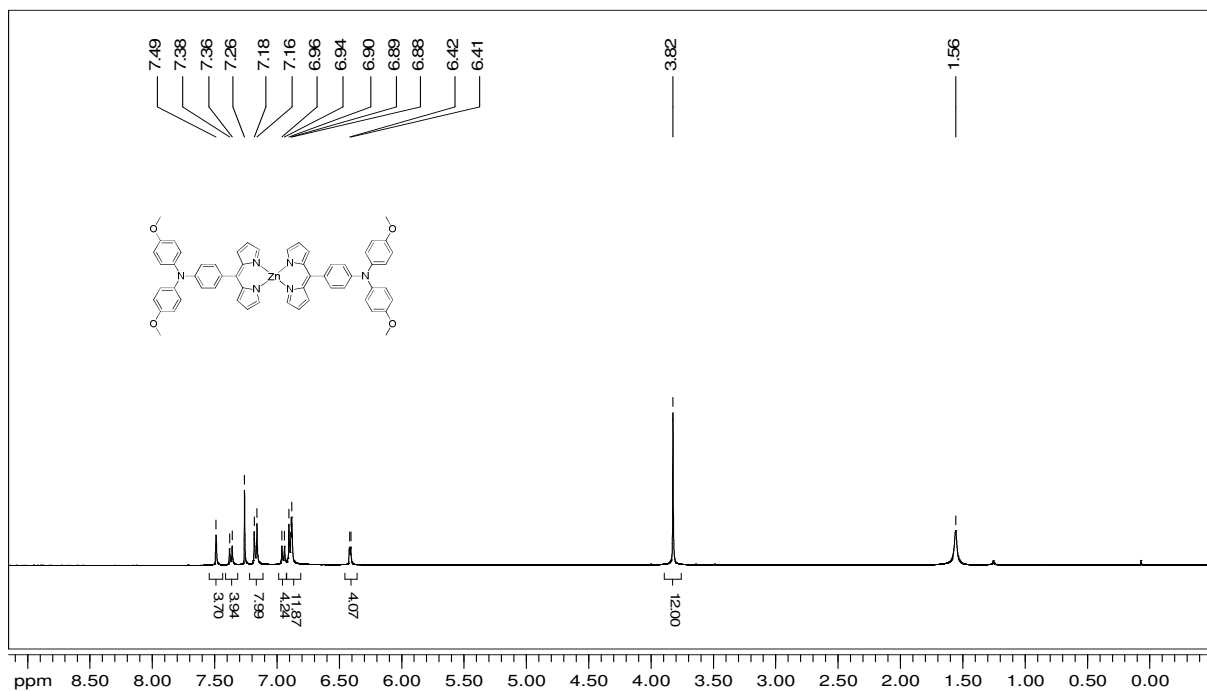

Figure S3. <sup>1</sup>H NMR of Y3 in CDCl<sub>3</sub>

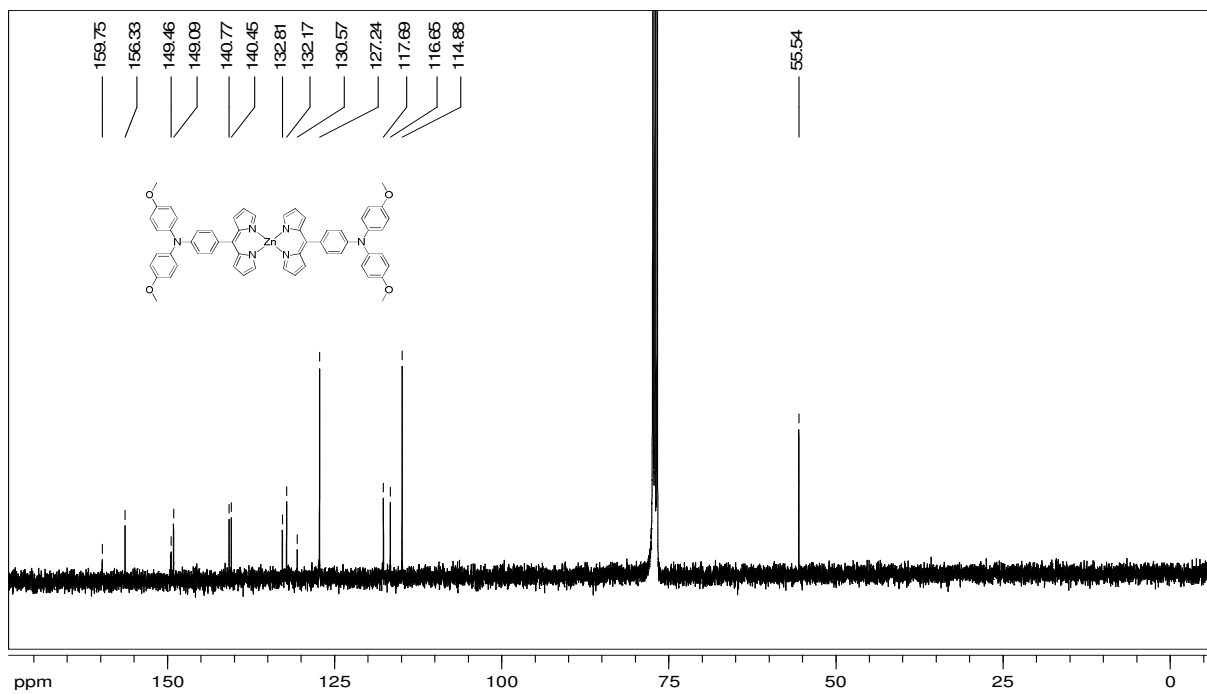

Figure S4. <sup>13</sup>C NMR of Y3 in CDCl<sub>3</sub>

LJJ-1(CHCA)  
17032900 82 (2.734)

TOF LD+  
5.93e3

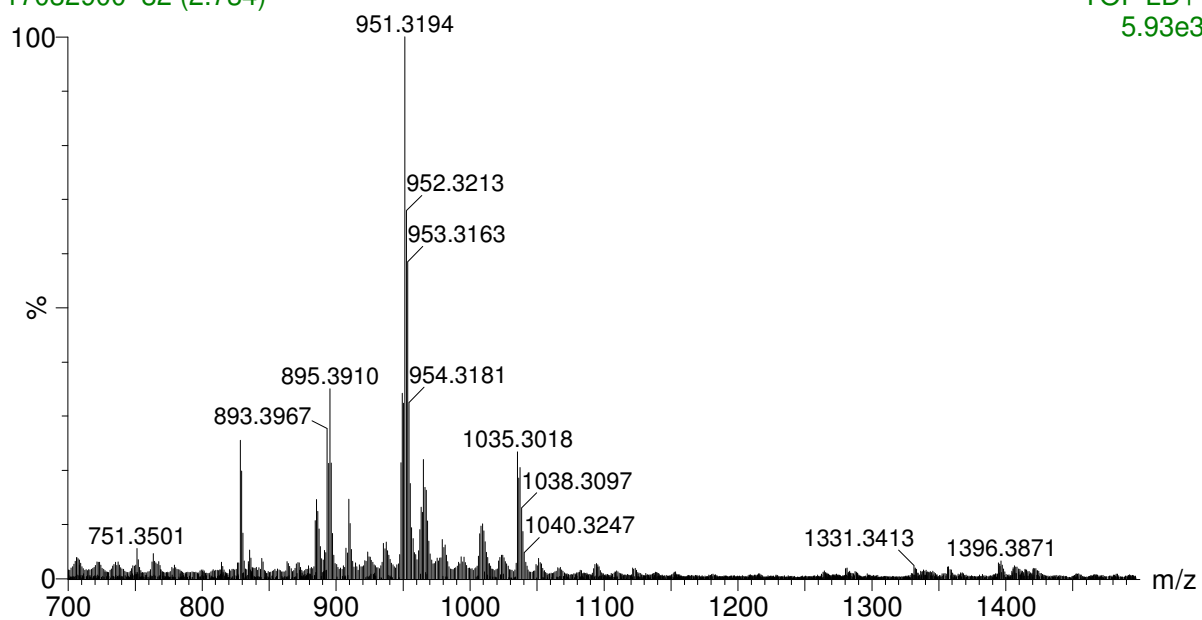

Figure S5. Mass Spectroscopy of Y1

LJJ-2  
17032902 30 (0.999)

TOF LD+  
1.67e3

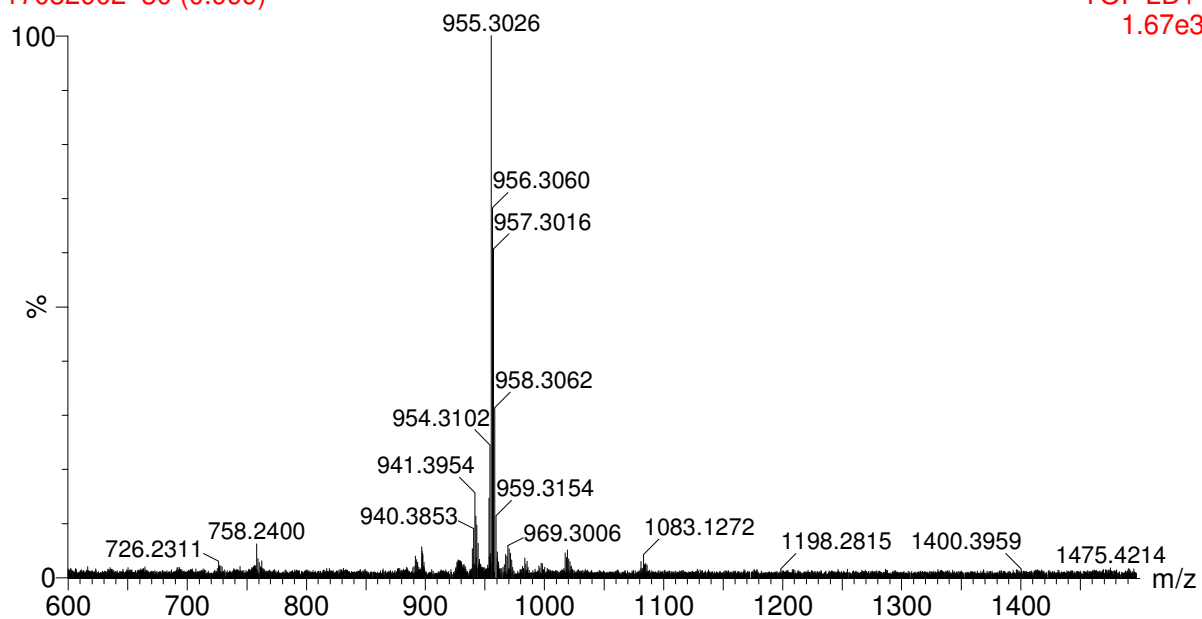

Figure S6. Mass Spectroscopy of Y2

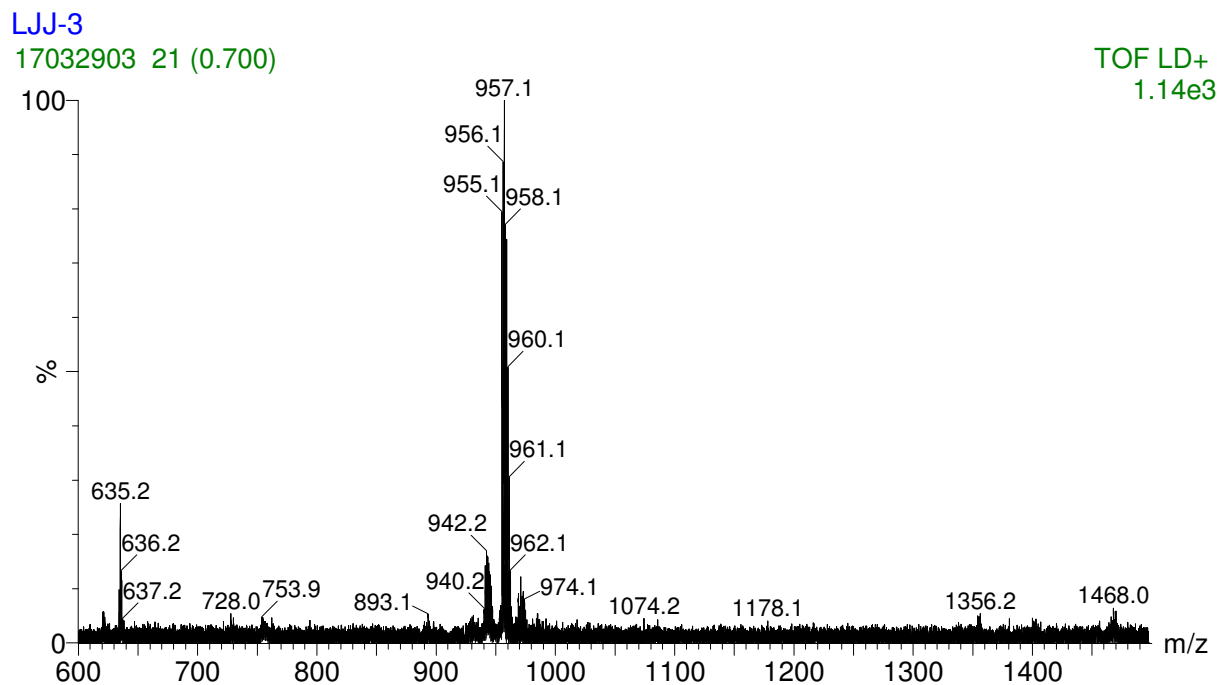

Figure S7. Mass Spectroscopy of **Y3**

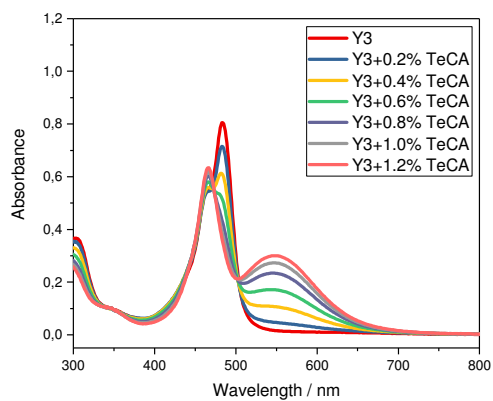

Figure S8. changes in the UV-vis spectra of **Y3** with gradual addition of different amounts of TeCA as dopant.

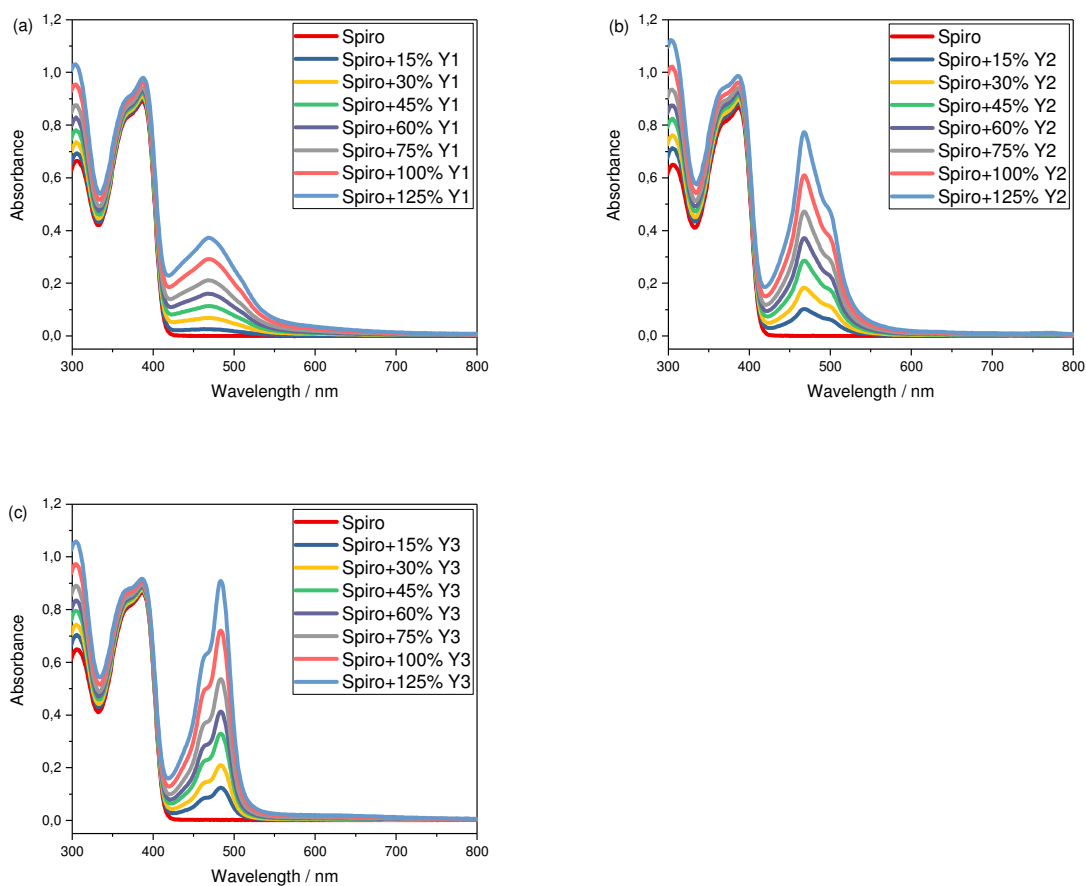

Figure S9. (a) UV/vis absorption of Spiro-OMeTAD with gradual addition of different amounts of **Y1** as dopant. (b) UV/vis absorption of Spiro-OMeTAD with gradual addition of different amounts of **Y2** as dopant. (c) UV/vis absorption of Spiro-OMeTAD with gradual addition of different amounts of **Y3** as dopant.

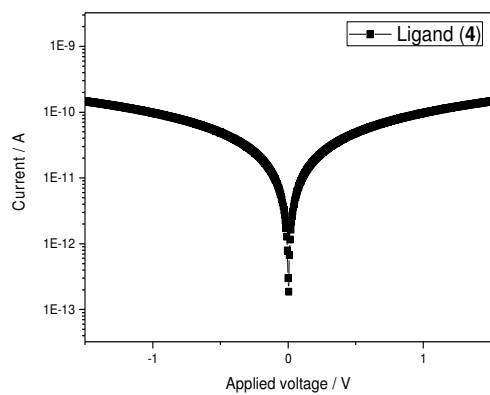

Figure S10. Current-voltage characteristics of ligand (4) with doping of 10 mM LiTFSI, 100 mM TBP and 4% volume TeCA

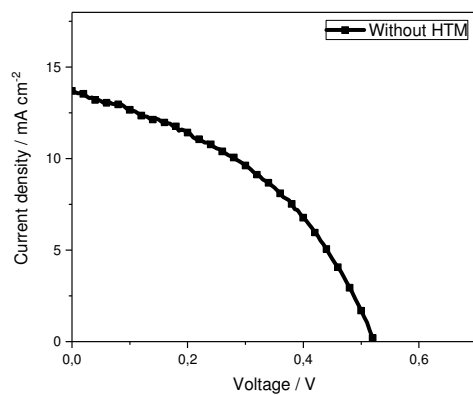

Figure S11. Photovoltaic performance of perovskite solar cell without hole transport materials.

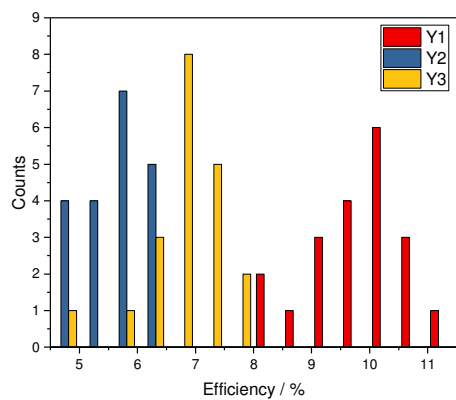

Figure S12. Distribution of efficiencies of PSCs based on **Y1**, **Y2** and **Y3** as hole transport materials.

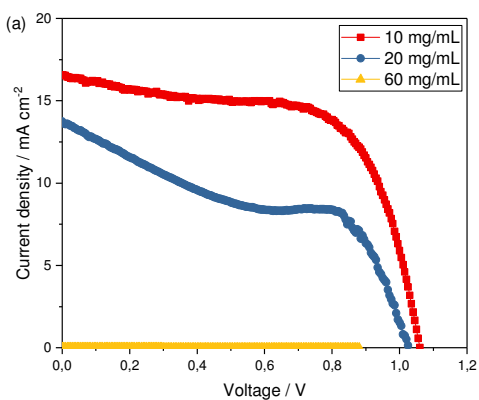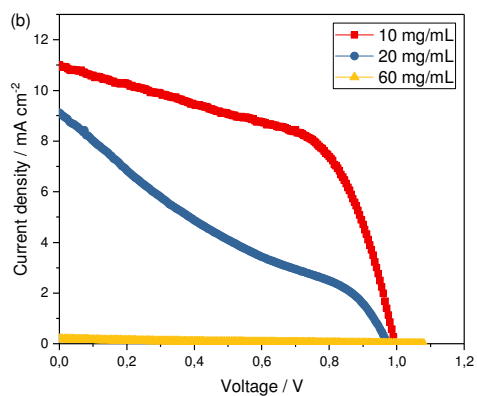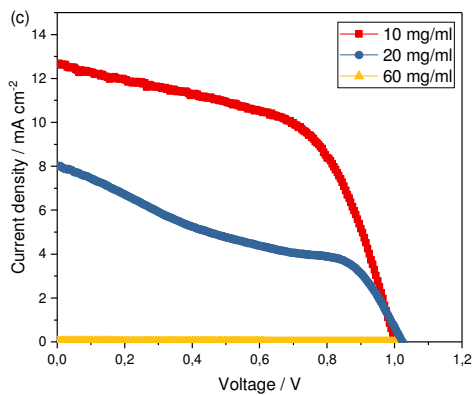



Figure S13. (a) Photovoltaic performance with increased concentrations of **Y1**, (b) Photovoltaic performance with increased concentrations of **Y2**. (c) Photovoltaic performance with increased concentrations of **Y3**.
